# Supplementary material for: The Synthesis of a Pt/SAPO-11 Composite with Trace Pt Loading and Its Catalytic Application in n-Heptane Hydroisomerization
Source: MDPI journal article supplement (doi:10.3390/catal13101383), 2023-10-20
Supplement: s1 [file s1]

Electronic Supporting Information to:

# The Synthesis of a Pt/SAPO-11 Composite with Trace Pt Loading and its Catalytic Application in *n*-Heptane Hydroisomerization

Zhen Jiang <sup>1</sup>, Liduo Chen <sup>1</sup>, Yanhong Cui <sup>1</sup>, Huijie Gao <sup>2</sup>, Yisi Zhou <sup>3</sup>, Wei Zhang <sup>1</sup>, Yanhua Suo <sup>1</sup>  
and Yingjun Wang <sup>1,\*</sup>

<sup>1</sup> Provincial Key Laboratory of Polyolefin New Materials, College of Chemistry & Chemical Engineering, Northeast Petroleum University, Daqing 163318, China; jz7985074@163.com (Z.J.); 15845817457@163.com (L.C.); cyhwyh@163.com (Y.C.); ruoqiwei@sina.com (W.Z.); suoyanhuatougao@163.com (Y.S.)

<sup>2</sup> Shaanxi Institute of Geological Survey Experiment Center, Xi'an 710000, China; gaoxiaobei4444@126.com

<sup>3</sup> Petrochemical Research Institute, Daqing Chemical Research Center, Daqing 163714, China; zys459@petrochina.com.cn

\* Correspondence: yjw1963@nepu.edu.cn; Tel.: +86-0459-6504154

**Table of contents:**

|                                                                      |
|----------------------------------------------------------------------|
| Figure S1 XRD of SAPO-11 and JCPDS:47-0614                           |
| Figure S2: SEM and EDS Mapping of SAPO-11                            |
| Figure S3: SEM and EDS Mapping of 0.1Pt/SAPO-11                      |
| Figure S4: SEM and EDS Mapping of 0.2Pt/SAPO-11                      |
| Figure S5: SEM and EDS Mapping of 0.5Pt/SAPO-11                      |
| Figure S6: SEM and EDS Mapping of 0.8Pt/SAPO-11                      |
| Figure S7: SEM and EDS Mapping of 1.0Pt/SAPO-11                      |
| Figure S8: Pore diameter distributions of SAPO-11 and $x$ Pt/SAPO-11 |
| Figure S9 Partial enlarged FT-IR spectra of samples.                 |
| Figure S10: Py-IR spectra of 0.5Pt/SAPO-11                           |
| Figure S11: XPS spectra of 0.5Pt/SAPO-11                             |
| Table S1 Comparison of catalysts reported in literature              |

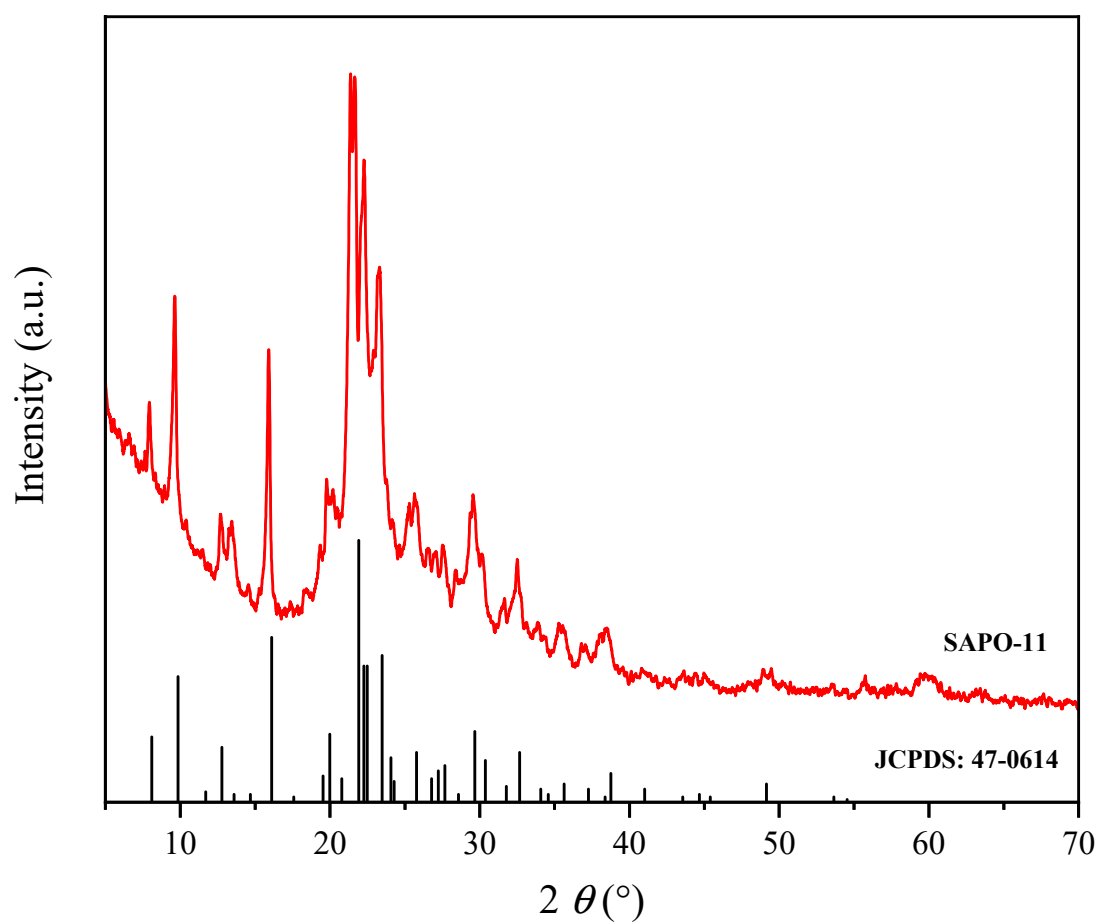

**Figure S1.** XRD of SAPO-11 and JCPDS:47-0614.

Sharp peaks of SAPO-11 appeared at the  $2\theta$  values of 17.9, 9.6, 12.6, 13.3, 15.9, 19.3, 19.8, 21.4, 21.6, 22.5, 23.1, 25.6, 29.6, 38.4, which were attributed to typical SAPO-11 topology structure card JCPDS 00-047-0614.

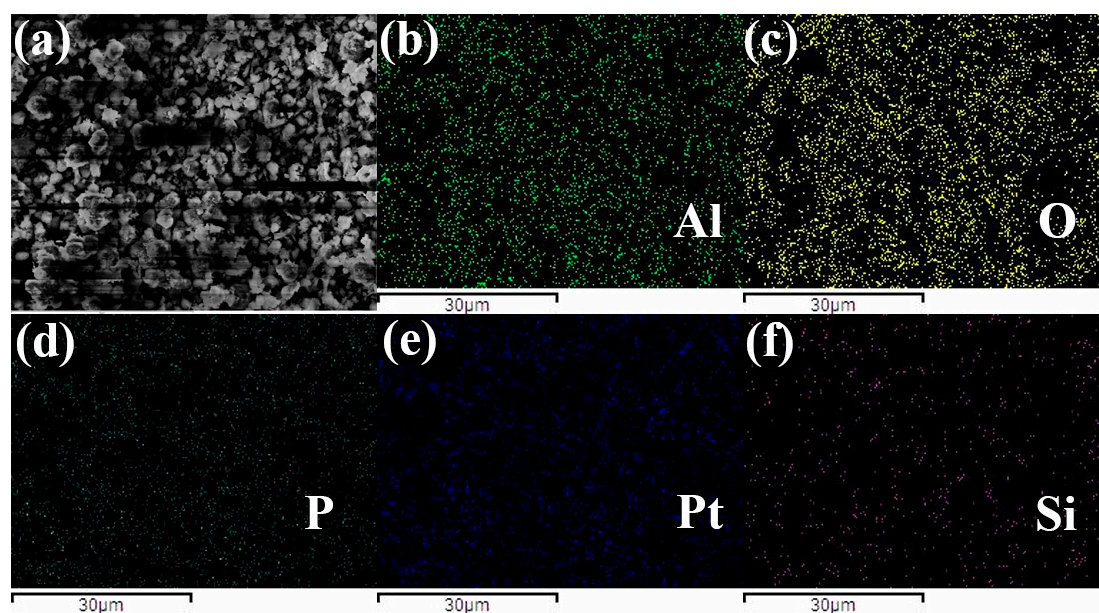

**Figure S2.** SEM of (a) SAPO-11 and EDS Mapping of (b) Al, (c) O, (d) P, (e) Pt and (f) Si element.

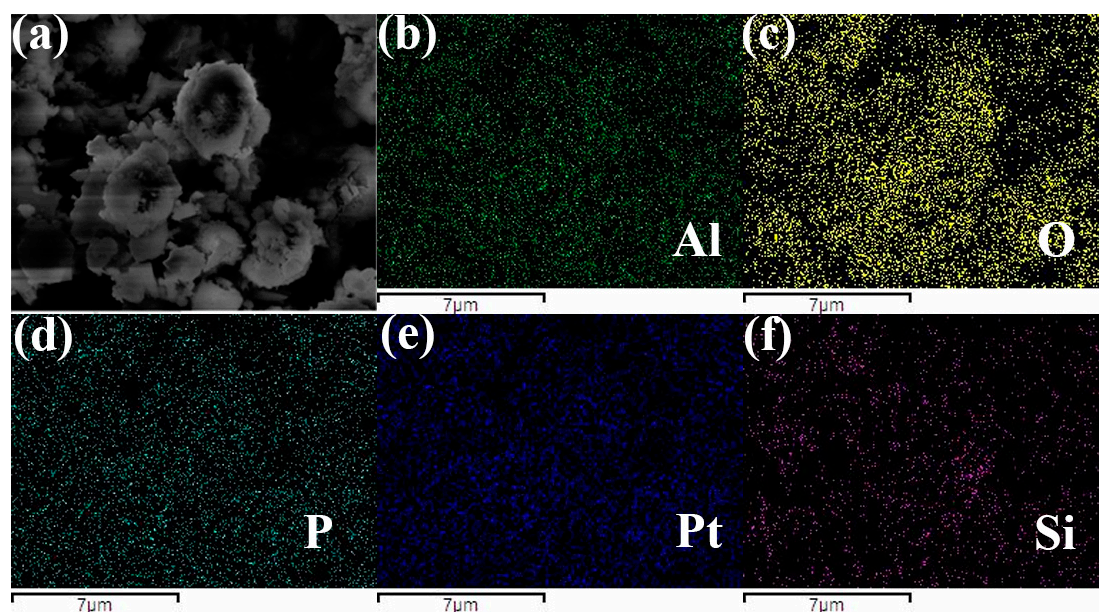

**Figure S3.** SEM of (a) 0.1Pt/SAPO-11 and EDS Mapping of (b) Al, (c) O, (d) P, (e) Pt and (f) Si element.

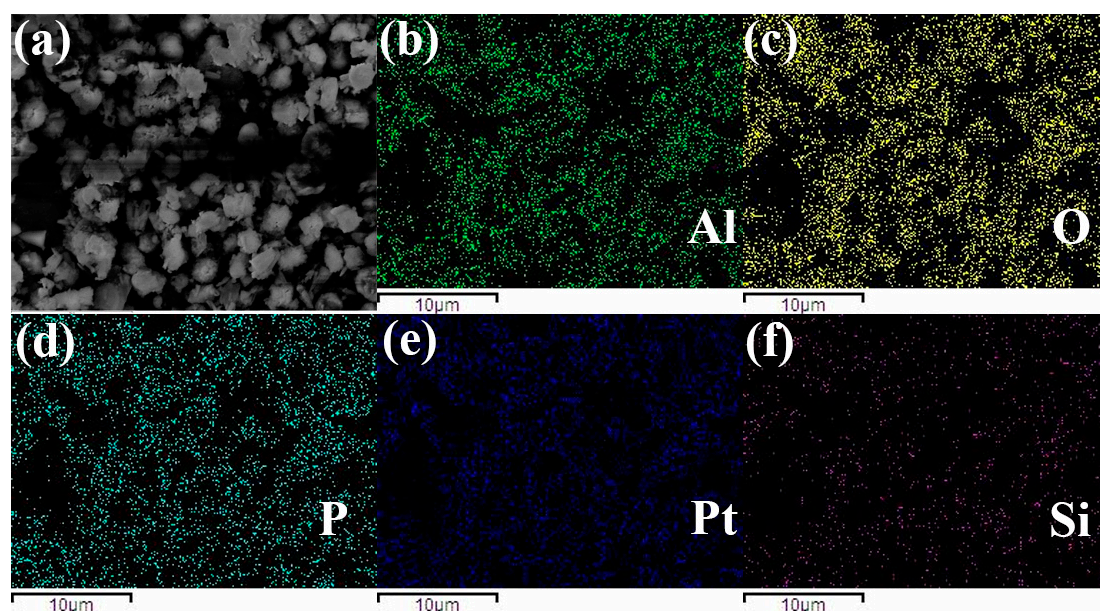

**Figure S4.** SEM of (a) 0.2Pt/SAPO-11 and EDS Mapping of (b) Al, (c) O, (d) P, (e) Pt and (f) Si element.

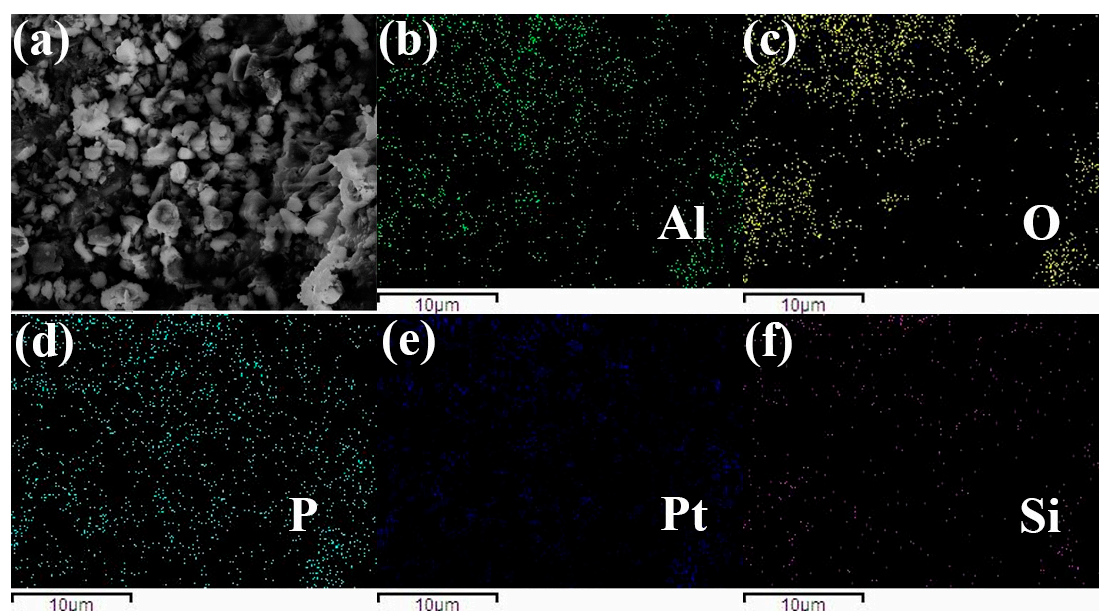

**Figure S5.** SEM of (a) 0.5Pt/SAPO-11 and EDS Mapping of (b) Al, (c) O, (d) P, (e) Pt and (f) Si element.



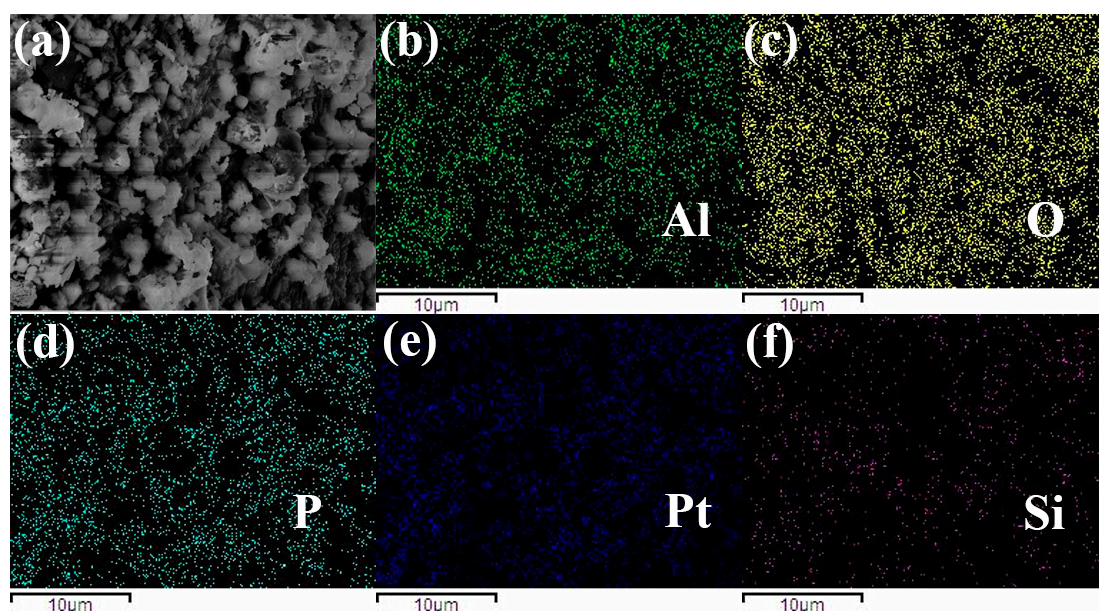

**Figure S6.** SEM of (a) 0.8Pt/SAPO-11 and EDS Mapping of (b) Al, (c) O, (d) P, (e) Pt and (f) Si element.

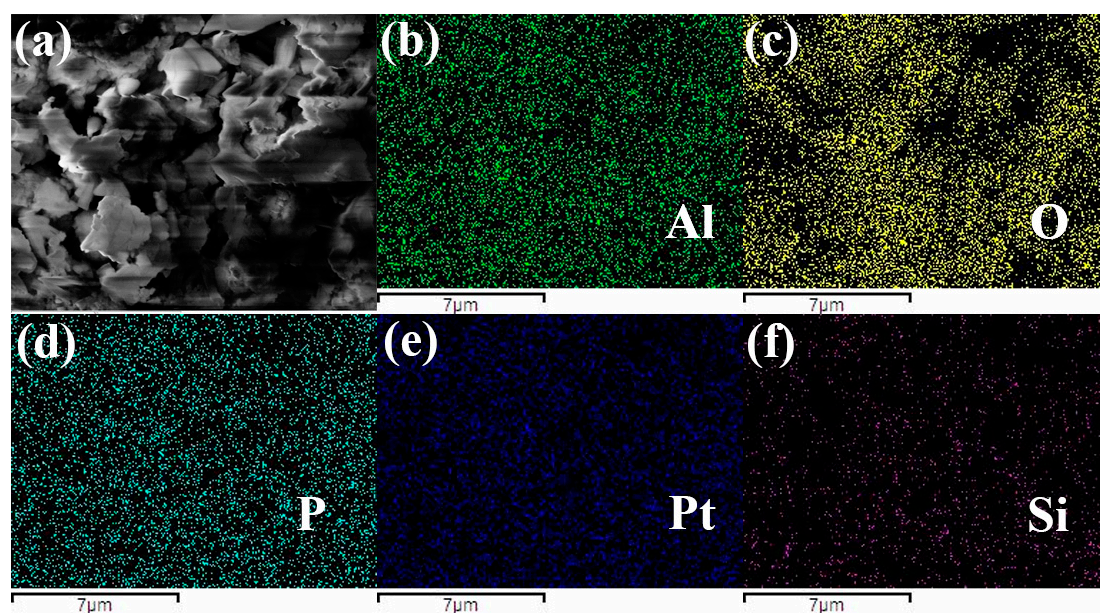

**Figure S7.** SEM of (a) 1.0Pt/SAPO-11 and EDS Mapping of (b) Al, (c) O, (d) P, (e) Pt and (f) Si element.



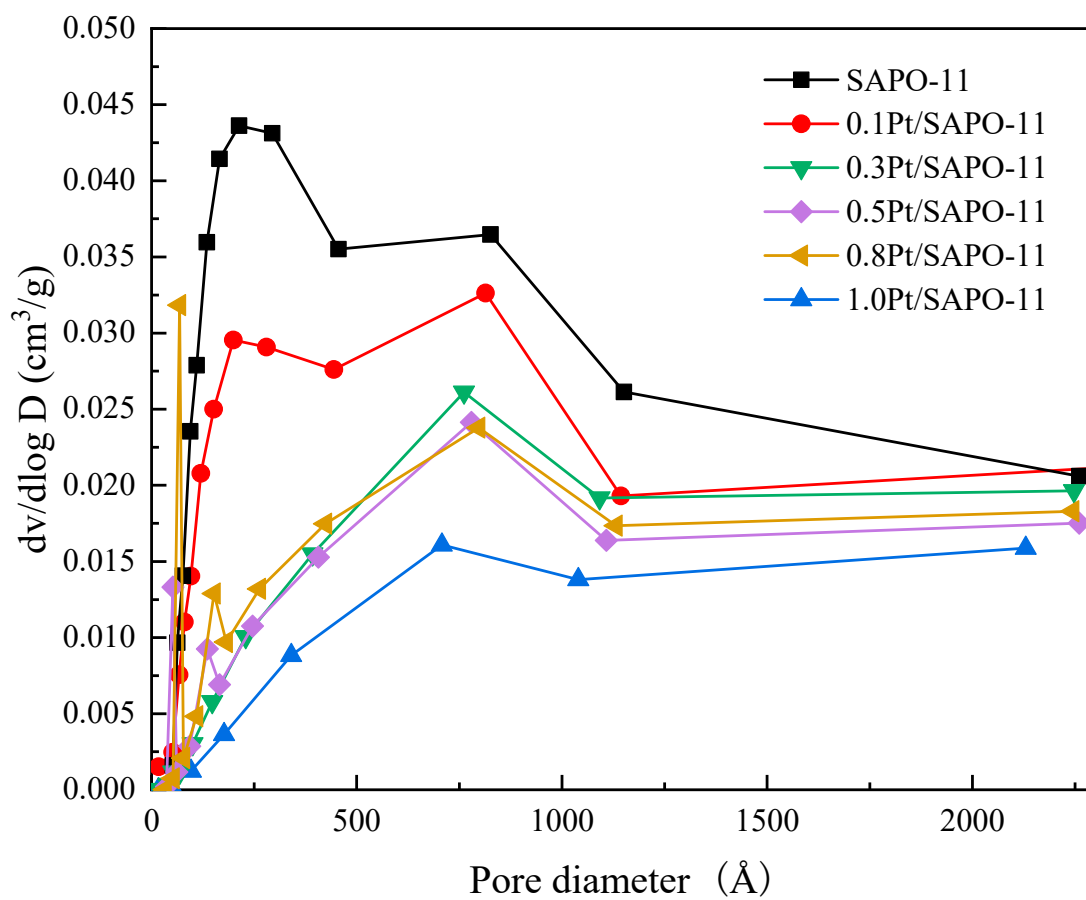

**Figure S8.** Pore diameter distributions of SAPO-11, 0.1Pt/SAPO-11, 0.2Pt/SAPO-11, 0.5Pt/SAPO-11, 0.8Pt/SAPO-11, 1.0Pt/SAPO-11.

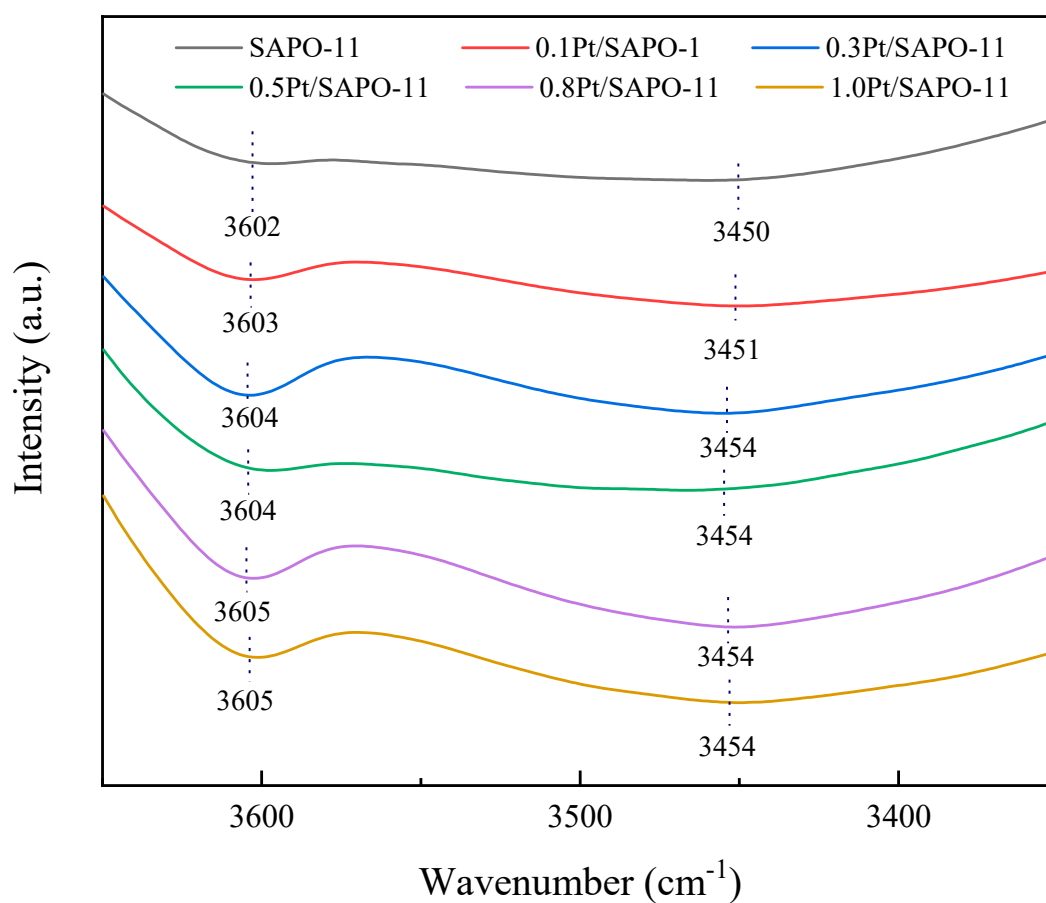

**Figure S9.** Partial enlarged FT-IR spectra of samples.

Compared with SAPO-11, stretching vibrations of Si-OH and Al-OH occurred slight blue shift of xPt/SAPO-11. For example, compared with SAPO-11, Si-OH-Al stretching vibrations of 0.5Pt/SAPO-11 blue shifted from 3602 cm<sup>-1</sup> to 3604 cm<sup>-1</sup>, and Al-OH stretching vibrations of 0.5Pt/SAPO-11 blue shifted from 3450 cm<sup>-1</sup> to 3454 cm<sup>-1</sup>.

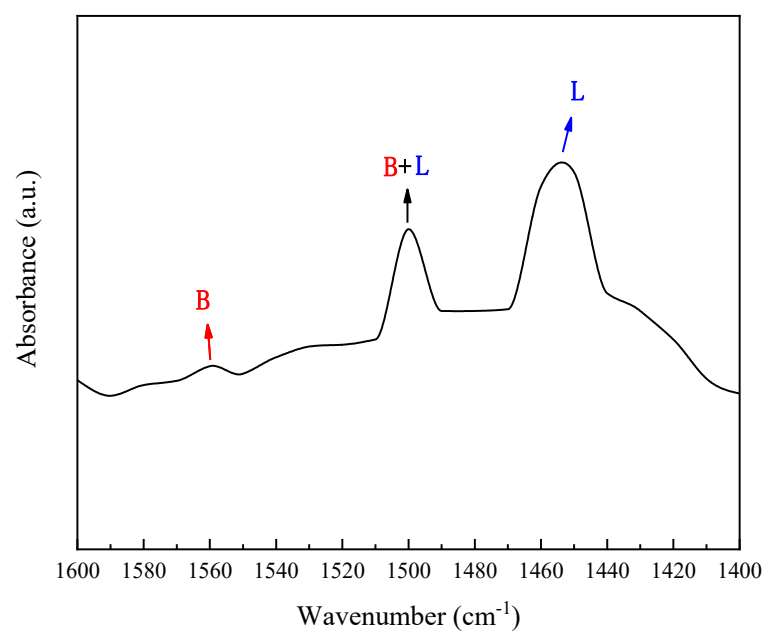

**Figure S10.** Py-IR spectra of 0.5Pt/SAPO-11, B represents for Brønsted acid, L represents for Lewis acid.

Bands located around 1560 cm<sup>-1</sup> and 1455 cm<sup>-1</sup> were assigned to Brønsted acid site and Lewis acid site, respectively, while the peak around 1500 cm<sup>-1</sup> was attributed to the interaction between Lewis and Brønsted acid site.

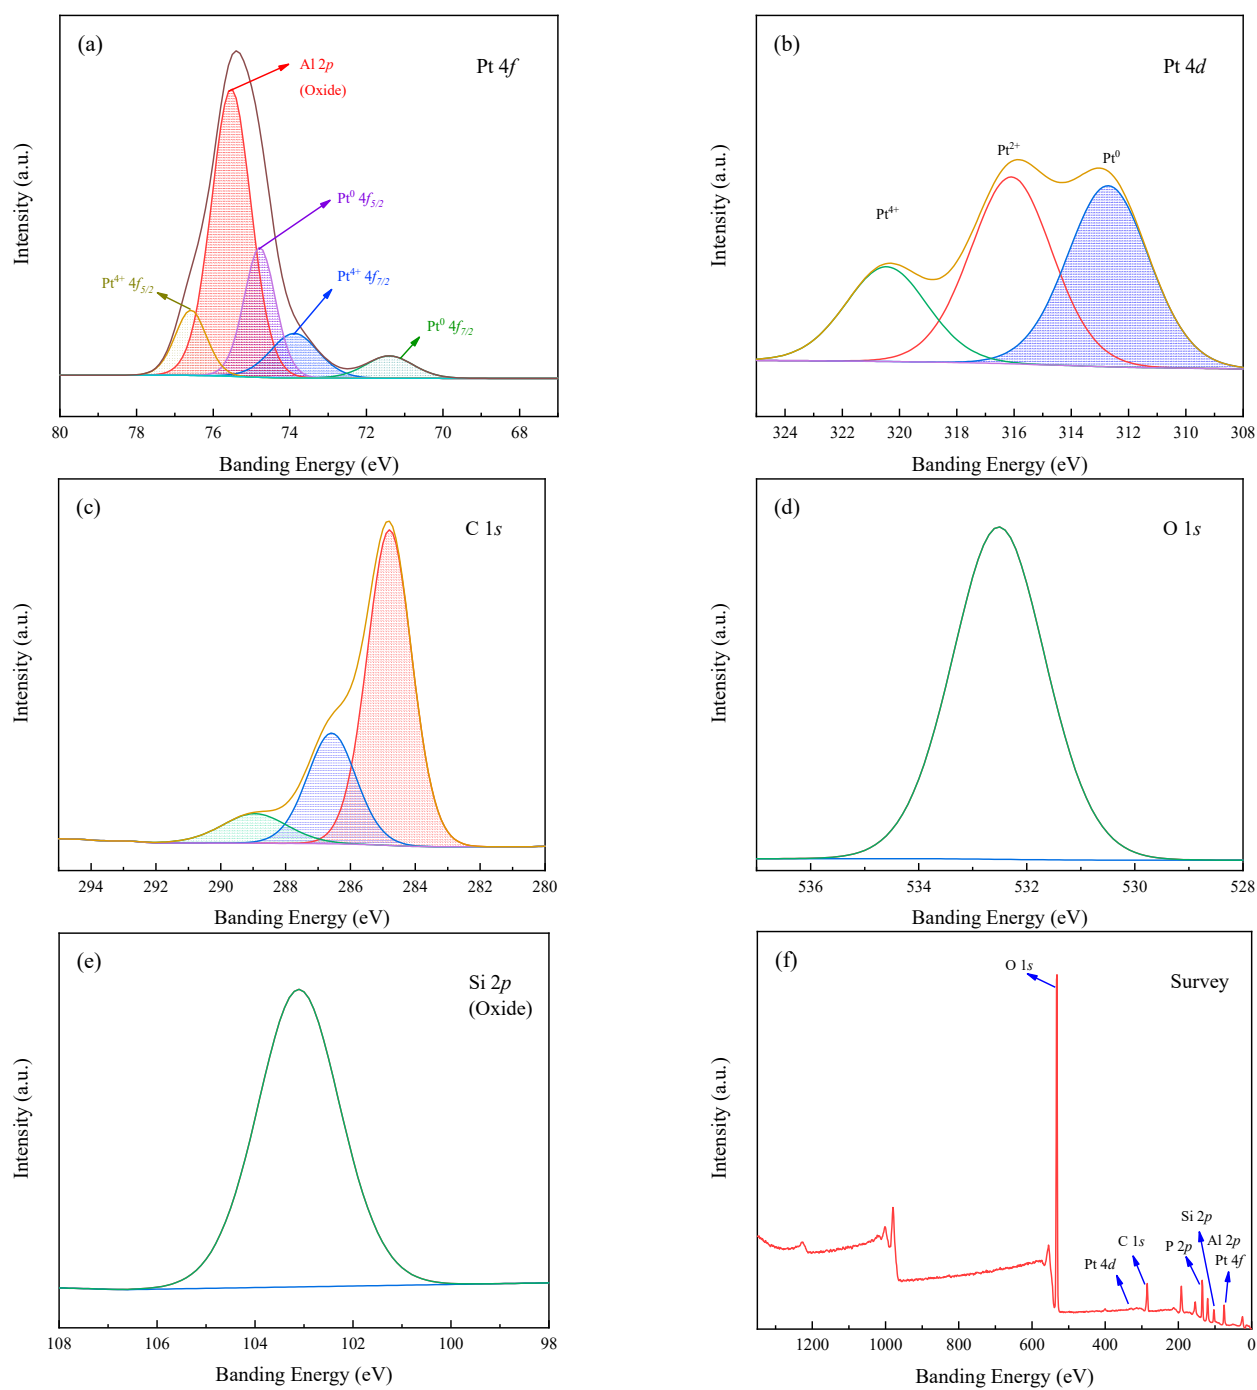

Figure S11. XPS spectra of s0.5Pt/SAPO-11.

**Table S1. Comparison of catalysts reported in literature.**

| Catalyst               | <i>n</i> -alkanes    | Reaction conditions |          |                            | Catalytic performance                         | Reference |
|------------------------|----------------------|---------------------|----------|----------------------------|-----------------------------------------------|-----------|
|                        |                      | T(°C)               | Pressure | WHSV<br>(h <sup>-1</sup> ) |                                               |           |
| 0.5Pt/SAPO-11          | <i>n</i> -heptane    | 310                 | 0.1 MPa  | 6.8                        | 65% isomer selectivity at 77% conversion      | This work |
| 0.5%Pt/SAPO-11         | <i>n</i> -heptane    | 327                 | 1 bar    | 1.0                        | ≈80% isomer selectivity at 92% conversion     | 1         |
| 1.5Pt/H-MOR            | <i>n</i> -hexane     | 275                 | 1 bar    | 0.25                       | ≈60% isomer selectivity at 58% conversion     | 2         |
| Pt/SAPO-11             | <i>n</i> -octane     | 340                 | 2 MPa    | 1.0                        | ≈82% isomer selectivity at 89% conversion     | 3         |
| Pt-Cl                  | <i>n</i> -dodecane   | 320                 | 0.1 MPa  | 4.0                        | ≈75% isomer selectivity at 64% conversion     | 4         |
| 0.2%Pt/50%S-Al         | bio-aviation fuel    | 340                 | 3 MPa    | 0.8                        | ≈62% isomer selectivity at 100% conversion    | 5         |
| 0.5%Pt/SAPO-11         | <i>n</i> -dodecane   | 340                 | 8 MPa    | 1.0                        | ≈50% isomer selectivity at 87% conversion     | 6         |
| 0.5%Pt/ZSM-22          | <i>n</i> -hexadecane | 310                 | 4 MPa    | 1.0                        | ≈70% isomer selectivity at 70% conversion     | 7         |
| 0.5Pt/siliceous ZSM-22 | <i>n</i> -dodecane   | 330                 | 4 MPa    | 1.2                        | ≈78% isomer selectivity at 95% conversion     | 8         |
| V-0.15%Pt/SAPO-11      | <i>n</i> -hexadecane | 315                 | 2 MPa    | 3.1                        | ≈94.4% isomer selectivity at 94.3% conversion | 9         |



## References

- [1] Jin, D.; Ye, G.; Zheng, J.; Yang, W.; Zhu, K.; Coppens, M. O.; Zhou, X. Hierarchical silicoaluminophosphate catalysts with enhanced hydroisomerization selectivity by directing the orientated assembly of premanufactured building blocks. *ACS Catal.* **2017**, *7*, 5887.
- [2] Pastvova, J.; Kaucky, D.; Moravkova, J.; Rathousky, J.; Sklenak, S.; Vorokhta, M.; Brabec, L.; Pilar, R.; Jakubec I.; Tabor, E.; Klein, P.; Sazama, P. Effect of Enhanced Accessibility of Acid Sites in Micromesoporous Mordenite Zeolites on Hydroisomerization of n-Hexane. *ACS Catal.* **2017**, *7*, 5781.
- [3] Yang, Z.; Liu, Y.; Zhao, J.; Gou, J.; Sun, K.; Liu, C. Zinc-modified Pt/SAPO-11 for improving the isomerization selectivity to dibranched alkanes. *Chinese J. Catal.* **2017**, *38*, 509-517.
- [4] Geng, L.; Gong, J.; Qiao, G.; Ye, S.; Zheng, Y.; Zhang, N.; Chen, B. Effect of metal precursors on the performance of Pt/SAPO-11 Catalysts for n-dodecane hydroisomerization. *ACS Omega* **2019**, *4*, 12598-12605.
- [5] Yang, H.; Du, X.; Lei, X.; Zhou, K.; Tian, Y.; Li, D.; Hu, C. Unraveling enhanced activity and coke resistance of Pt-based catalyst in bio-aviation fuel refining. *Appl. Energ.* **2021**, *301*, 117469.
- [6] Zhang, F.; Liu, Y.; Sun, Q.; Dai, Z.; Gies, H.; Wu, Q.; Pan, S.; Bian, C.; Tian, Z.; Meng, X.; Zhang, Y.; Zou, X.; Yi, X.; Zheng, A.; Wang, L.; Xiao, F. Hybridization chain reactions on silica coated Qbeads for the colorimetric detection of multiplex microRNAs. *Chem. Commun.* **2017**, *53*, 4954.
- [7] Wang, Y.; Tao, Z.; Wu, B.; Xu, J.; Huo, C.; Li, K.; Chen, H.; Yang, Y.; Li, Y. Effect of metal precursors on the performance of Pt/ZSM-22 catalysts for n-hexadecane hydroisomerization. *J. Catal.* **2015**, *322*, 1-13.
- [8] Niu, P.; Xi, H.; Ren, J.; Lin, M.; Wang, Q.; Jia, L.; Hou, B.; Li, D. High selectivity for n-dodecane hydroisomerization over highly siliceous ZSM-22 with low Pt loading. *Catal. Sci. Technol.* **2017**, *7*, 5055.
- [9] Wang, D.; Liu, J.; Cheng, X.; Kang, X.; Wu, A.; Tian, C.; Fu, H. Trace Pt clusters dispersed on SAPO-11 promoting the synergy of metal sites with acid sites for high-effective hydroisomerization of n-alkanes. *Small Methods* **2019**, *3*, 1800510.
